# Supplementary material for: Durene-decorated CBP derivatives as phosphorescent hosts and exciton-blocking materials for efficient blue OLEDs
Source: Royal Society of Chemistry journal article supplement (doi:10.1039/c2jm33636g), 2012-01-01
Supplement: c2jm33636g.pdf [file c2jm33636g.pdf]

## Supporting information

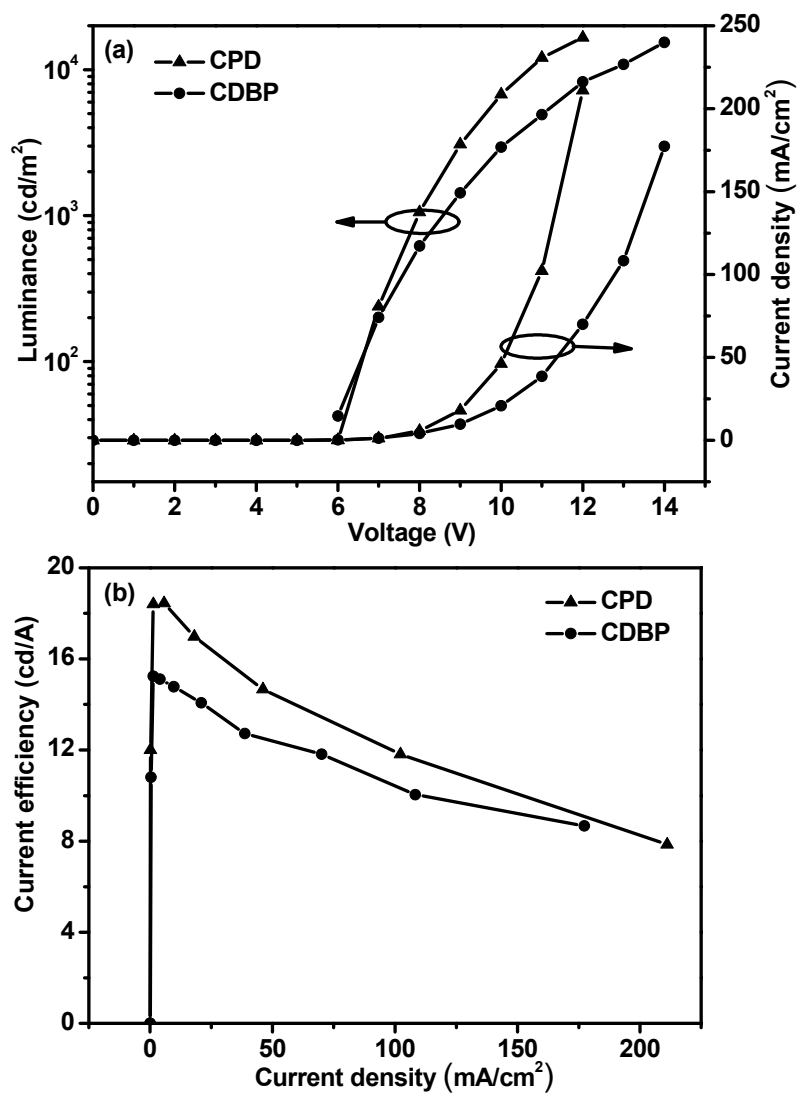

**Figure S1.** The current density-voltage-luminance ( $J-V-L$ ) curves for the CPD and CDBP devices. The device structures are ITO/PEDOT:PSS (40 nm)/NPB (20 nm)/host:FIrpic (10wt%, 30 nm)/TPBI (40 nm)/LiF (1 nm)/Al (150 nm), in which host = CPD or CDBP.
